# Supplementary material for: Silencing NADPH-cytochrome P450 reductase results in reduced acaricide resistance in Tetranychus cinnabarinus (Boisduval)
Source: PubMed Central journal article supplement (PMC4616063; doi:10.1038/srep15581), 2015-10-23
Supplement: srep15581-s1.pdf [file srep15581-s1.pdf]

## Supplementary Information

Prepared for Publication in **Scientific Reports**

Address Correspondence to:

Dr. Lin He

Key Laboratory of Entomology and

Pest Control Engineering

College of Plant Protection

Southwest University

Chongqing, China

Phone: +86-23-68251541

Fax: +86-23-68251514

E-mail :helinok@vip.tom.com

Dr. Qiang Xu

Department of Biology

ACU Box 27868

College of Arts and Sciences

Abilene Christian University

Abilene, Texas 79699 U.S.A.

Phone: +1-325-674-4883

Fax: +1-325-674-2009

E-mail : qxx07a@acu.edu

### **Silencing NADPH-cytochrome P450 reductase results in reduced acaricide resistance in *Tetranychus cinnabarinus* (Boisduval)**

Li Shi<sup>1</sup>, Jiao Zhang<sup>1</sup>, Guangmao Shen<sup>1</sup>, Zhifeng Xu<sup>1</sup>, Peng Wei<sup>1</sup>, Yichao Zhang<sup>1</sup>, Qiang Xu<sup>\*2</sup> and Lin He<sup>\*1</sup>

<sup>1</sup>Key Laboratory of Entomology and Pest Control Engineering, College of Plant Protection, Southwest University, Chongqing, China;

<sup>2</sup>Department of Biology, Abilene Christian University, Abilene, Texas, U.S.A.

\* To whom correspondence should be addressed

Table S1. Primers used for gene cloning, RNAi and qRT-PCR analysis

| Genes                          | GenBank No. | Primer Function     | Primer sequences (5' to 3')                                                                |
|--------------------------------|-------------|---------------------|--------------------------------------------------------------------------------------------|
| <i>GFP</i>                     | ACY56286    | RNAi                | F: taatacactcactatagggGCAGTTCTTGTGAATTAGATG<br>R: taatacactcactatagggTTTGGTTTGTCTCCCATGATG |
| <i>TcCPR</i>                   | KP710970    | RNAi                | F: taatacactcactatagggTGAAGCTGGAGATCATCTTG<br>R: taatacactcactatagggATCCATTCAGAGTACAAGGC   |
| <i>TcCPR</i>                   | KP710970    | Cloning full length | F: ATGGAAGAATCGCCTAATCAAGGAT<br>R: CTA ACTCCACACATCAGCAGAATAT                              |
| <i>TcCPR</i>                   | KP710970    | qRT-PCR             | F: GGGTGATGATGATGCAAACA<br>R: ACGATAGGTGCCAAGAATGG                                         |
| <i>CYP389B1</i>                | KF770839    | qRT-PCR             | F: ACGAGCCATGAATCCGTTAC<br>R: TGATCGGTGTGCTTCTCAAG                                         |
| <i>CYP392A26</i>               | KF770838    | qRT-PCR             | F: CGTGAACACAGACGGTTGTC<br>R: GCGACCAAATAAAAGAGCTGA                                        |
| <i>RPS18</i>                   | FJ608659    | qRT-PCR             | F: ACGTGCTGGTGA ACTTACCGAAGA<br>R: TGCCTATTCAAGAACCAAAGTGGG                                |
| <i><math>\alpha</math>-TUB</i> | FJ526336    | qRT-PCR             | F:ACTACGCTCGTGGCCACTATACAA<br>R:ACCAGATCCAGTTCCACCTCCAAA                                   |

Table S2. Sequences used for phylogenetic analysis

| Genes        | Gene ID or GenBank No. | Species                           |
|--------------|------------------------|-----------------------------------|
| <i>AaCPR</i> | XP_001656715           | <i>Aedes aegypti</i>              |
| <i>OsCPR</i> | ACL01092               | <i>Ochlerotatus sollicitans</i>   |
| <i>AfCPR</i> | ABO77954               | <i>Anopheles funestus</i>         |
| <i>DmCPR</i> | AGB92664.1             | <i>Drosophila melanogaster</i>    |
| <i>MdCPR</i> | AAA29295               | <i>Musca domestica</i>            |
| <i>BmCPR</i> | NP_001104834           | <i>Bombyx mori</i>                |
| <i>RhCPR</i> | XP_002423980           | <i>Pediculus humanus corporis</i> |
| <i>CfCPR</i> | EFN67037               | <i>Camponotus floridanus</i>      |
| <i>NiCPR</i> | KF591574               | <i>Nilaparvata lugens</i>         |
| <i>CiCPR</i> | AFD50507               | <i>Cimex lectularius</i>          |
| <i>HaCPR</i> | ADK25060               | <i>Helicoverpa armigera</i>       |
| <i>AgCPR</i> | AAO24765               | <i>Anopheles gambiae</i>          |
| <i>TuCPR</i> | tetur18g03390          | <i>Tetranychus urticae</i>        |
| <i>MoCPR</i> | XP_003740943           | <i>Metaseiulus occidentalis</i>   |
| <i>RpCPR</i> | JAA59930               | <i>Rhipicephalus pulchellus</i>   |
| <i>IsCPR</i> | XP_002400171           | <i>Ixodes scapularis</i>          |
| <i>BtCPR</i> | AAI03400               | <i>Bos Taurus</i>                 |
| <i>RnCPR</i> | NP_113764.1            | <i>Rattus norvegicus</i>          |
| <i>HsCPR</i> | NP_000932              | <i>Homo sapiens</i>               |
